# Supplementary material for: 89Zr-Onartuzumab PET imaging of c-MET receptor dynamics
Source: Springer Nature journal article supplement (doi:10.1007/s00259-017-3672-x), 2017-03-18

**Supplementary Fig. 1 (a)** Conjugation reaction efficiency of Df to onartuzumab at varying molar reaction ratios. **(b)** Radiochemical purity for  $^{89}\text{Zr}$  labelling at various conjugation ratios for Df to onartuzumab, with specific activities between 50-1000 MBq/mg conjugate. **(c)** Retained affinity of  $^{89}\text{Zr}$ -onartuzumab at varying molar conjugation ratios of Df to onartuzumab, compared to naked onartuzumab by competition assay. **(d)** Stability of  $^{89}\text{Zr}$ -onartuzumab in 0.9% NaCl at 4° C, human serum at 37° C and HEPES pH 7.2 at 37° C up to 7 days

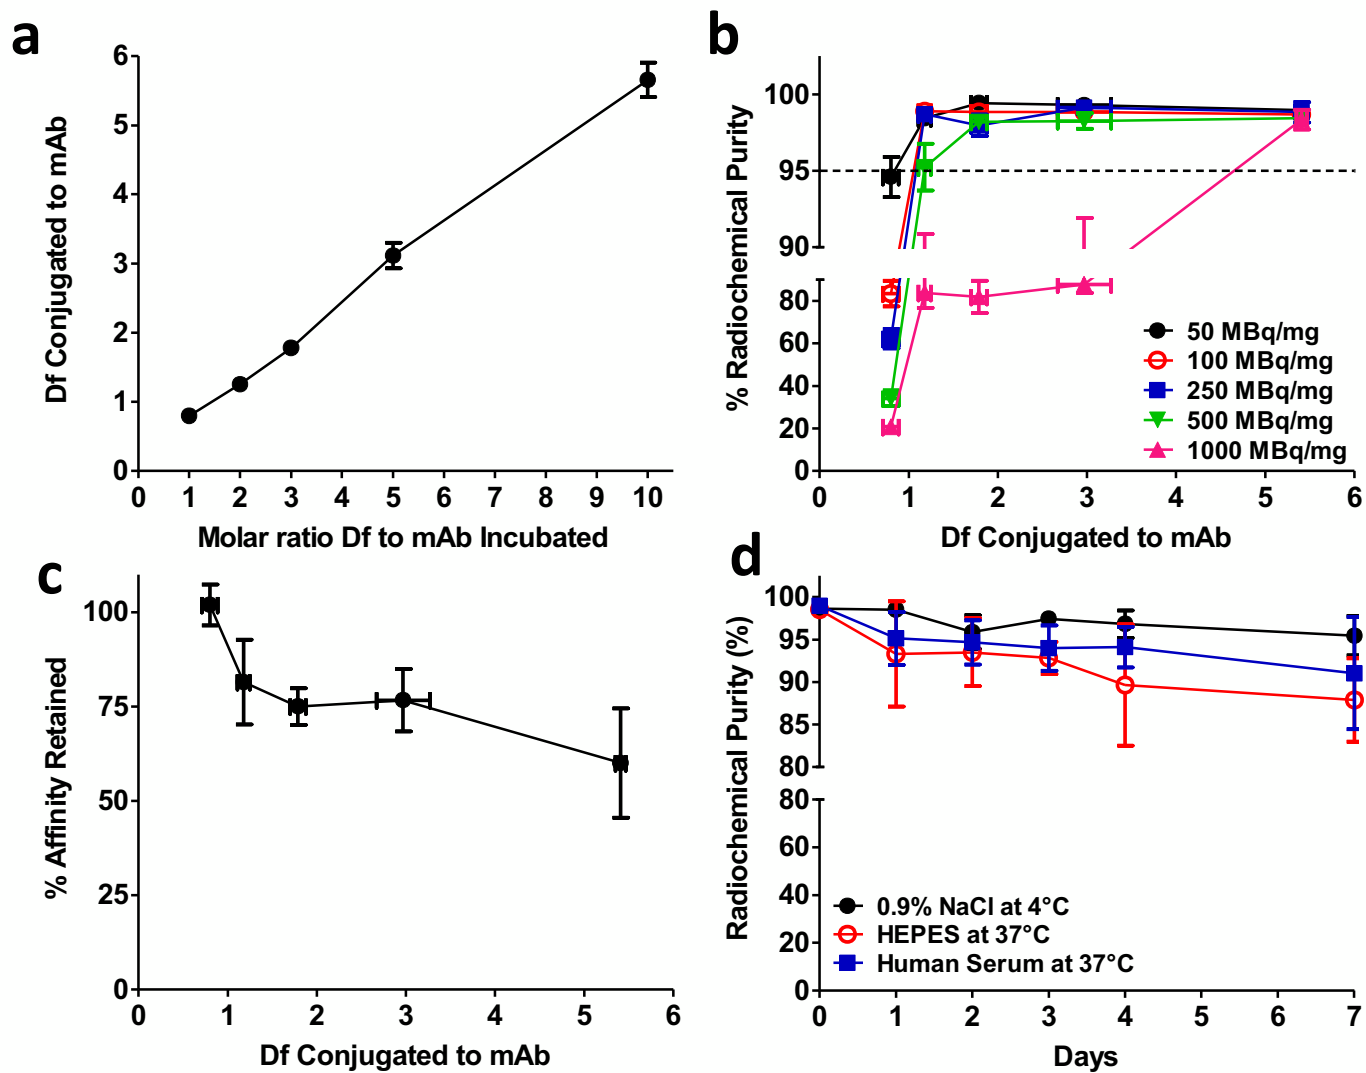

Supplement: MOESM1 [file 12153248]
