# Supplementary material for: 89Zr-Onartuzumab PET imaging of c-MET receptor dynamics
Source: Springer Nature journal article supplement (doi:10.1007/s00259-017-3672-x), 2017-03-18

**Supplementary Fig. 3** *Ex vivo* organ uptake of 10  $\mu\text{g}$   $^{89}\text{Zr}$ -onartuzumab and 10  $\mu\text{g}$   $^{111}\text{In}$ -OA-NBC in HCC827 and HCC827ErlRes tumour bearing mice, 6 days pi. Data are expressed as % ID/g  $\pm$  SD

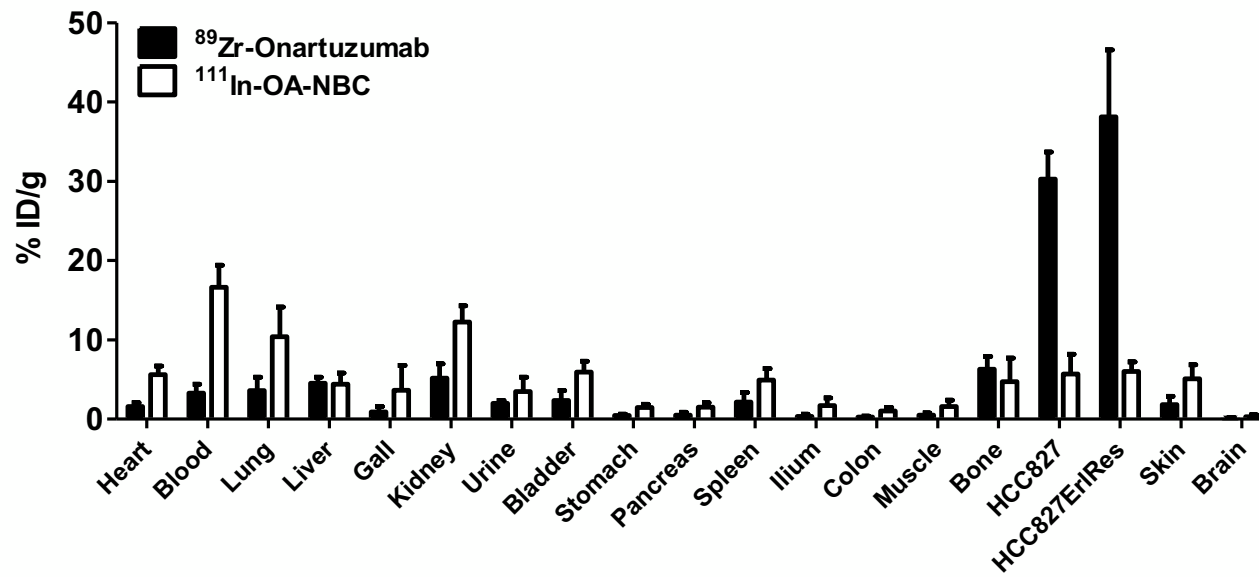

Supplement: MOESM3 [file 12153248]
