# Supplementary material for: 89Zr-Onartuzumab PET imaging of c-MET receptor dynamics
Source: Springer Nature journal article supplement (doi:10.1007/s00259-017-3672-x), 2017-03-18

**Supplementary Fig. 5** Histologic grading of necrosis (H&E staining) of **(a)** HCC827 and HCC827ErIRes tumours and **(b)** vehicle and NVP-AUY-922 treated HCC827 tumours, with 0+ being 0-5% necrosis, 5-15% necrosis 1+, 15-25% necrosis 2+, 25-35% necrosis 3+ and over 35% necrosis as 4+.

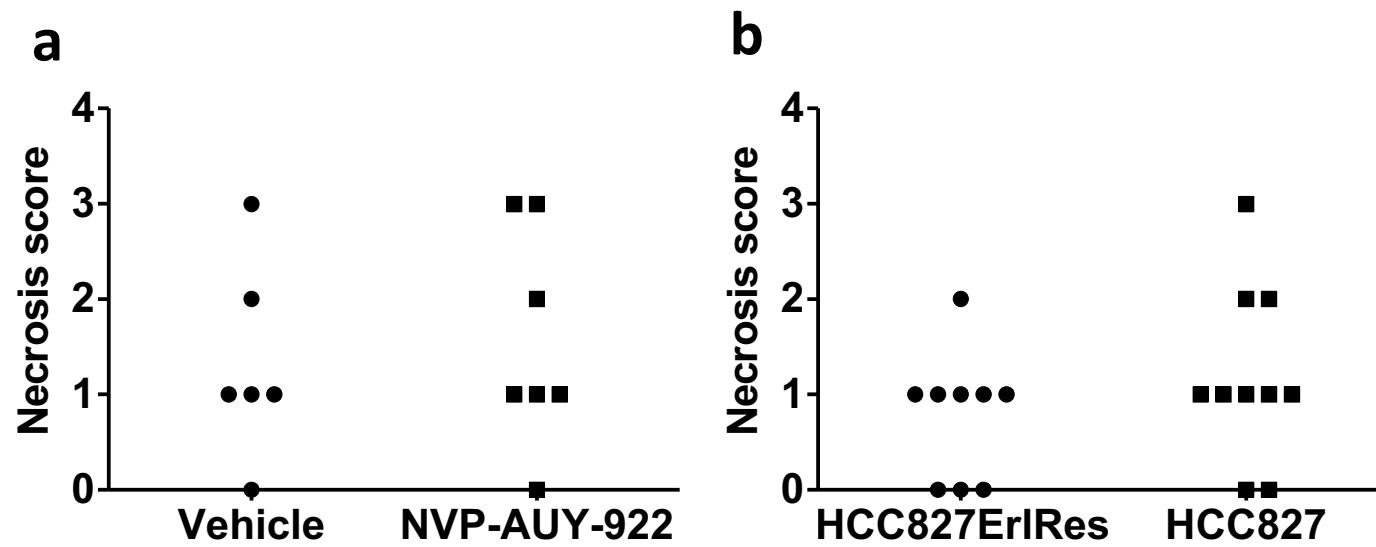

Supplement: MOESM5 [file 12153248]
