# Supplementary material for: 89Zr-Onartuzumab PET imaging of c-MET receptor dynamics
Source: Springer Nature journal article supplement (doi:10.1007/s00259-017-3672-x), 2017-03-18

**Supplementary Fig. 6** Correlation of *ex vivo*  $^{89}\text{Zr}$ -onartuzumab/ $^{89}\text{Zr}$ -OACD8 tumour uptake in % ID/g with *in vivo* PET tumour uptake in  $\text{SUV}_{\text{mean}}$

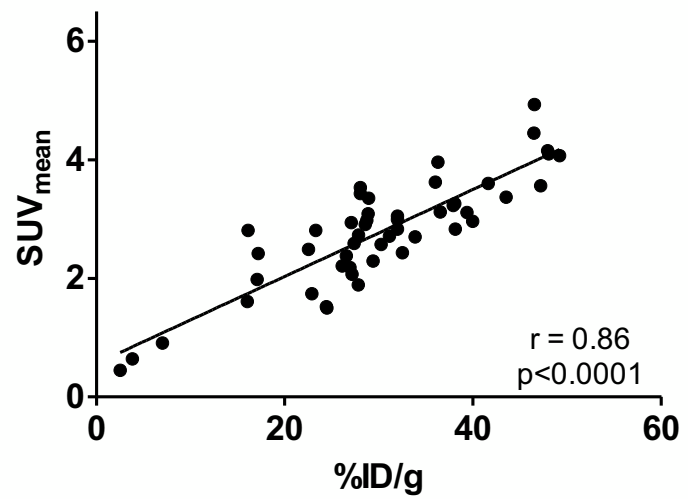

Supplement: MOESM6 [file 12153248]
